# Supplementary material
Source: PubMed Central journal article supplement (PMC4375084)
Supplement: supp_db14-1164_DB141164SupplementaryData.pdf [file supp_db14-1164_DB141164SupplementaryData.pdf]

## SUPPLEMENTARY DATA

### **Non-canonical Wnt signaling promotes obesity-induced adipose tissue inflammation and metabolic dysfunction**

José J. Fuster<sup>1</sup>, María A. Zuriaga<sup>1</sup>, Doan Thi-Minh Ngo<sup>2</sup>, Melissa G. Farb<sup>3</sup>, Tamar Aprahamian<sup>1,4</sup>, Terry P. Yamaguchi<sup>5</sup>, Noyan Gokce<sup>3</sup> and Kenneth Walsh<sup>1</sup>.

<sup>1</sup>Molecular Cardiology, Whitaker Cardiovascular Institute, Boston University School of Medicine, 715 Albany Street, W-611, Boston, MA, USA

<sup>2</sup>Clinical Cardiology, Whitaker Cardiovascular Institute, Boston University School of Medicine, 715 Albany Street, E-7 C.H.U., Boston, MA, USA

<sup>3</sup>Cardiovascular Medicine, Whitaker Cardiovascular Institute, Boston University School of Medicine, 715 Albany Street, E-7 C.H.U., Boston, MA, USA

<sup>4</sup>Department of Medicine-Renal Section, Boston University School of Medicine, 715 Albany Street, W-507, Boston, MA, USA

<sup>5</sup>Cancer and Developmental Biology Lab, National Cancer Institute-Frederick, National Institutes of Health, Frederick, MD, USA

SUPPLEMENTARY DATA

**Supplementary Figure 1. Wnt5a ablation does not affect glucose homeostasis in lean mice.** (A) Schematic representation of the Cre-LoxP strategy used to generate whole-body inducible Wnt5a-deficient mice. (B) Body weight, (C) GTT and (D) ITT of 20-week-old Wnt5a-KO mice and WT littermates fed standard chow diet (n=6-8).

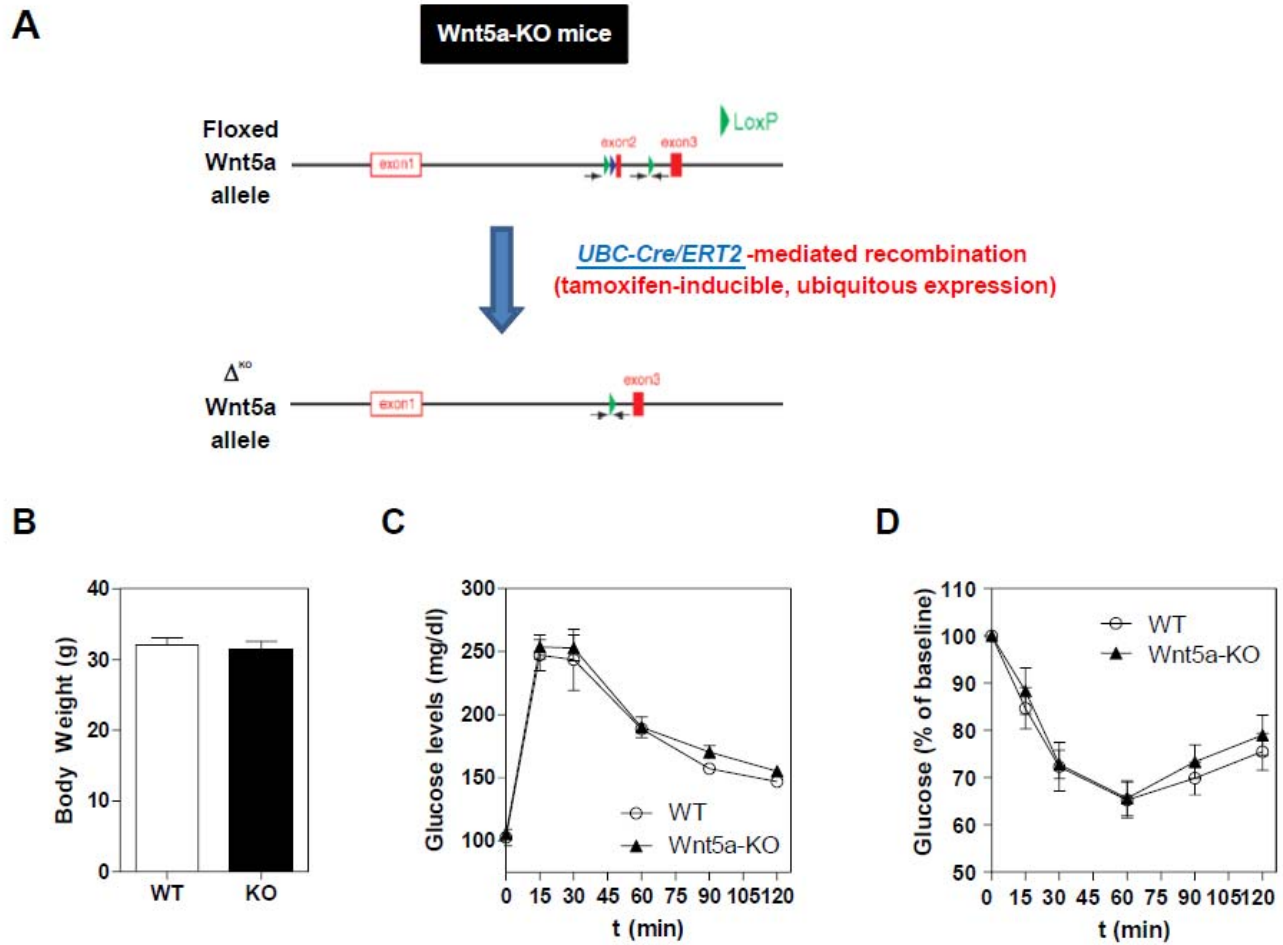

SUPPLEMENTARY DATA

**Supplementary Figure 2. Wnt5a ablation does not affect adipogenic expansion of white adipose tissue in HFHS-fed mice.** Wnt5a-KO mice and WT littermates were fed a HFHS for 12 weeks (n=4-7). (A) Body weight. (B) % body fat mass assessed by magnetic resonance imaging (EchoMRI-700, Echo Medical System). (C) Epididymal fat weight. (D) Mesenteric fat weight. (E) Peri-renal fat weight. (F) Adipocyte size evaluated by computer-assisted morphometric analysis using Adiposoft (Galarraga et al, J Lipid Res. 2012 Dec;53(12):2791-6). (G) qRT-PCR analysis of transcript expression of several adipogenic transcription factors and adipocyte markers.

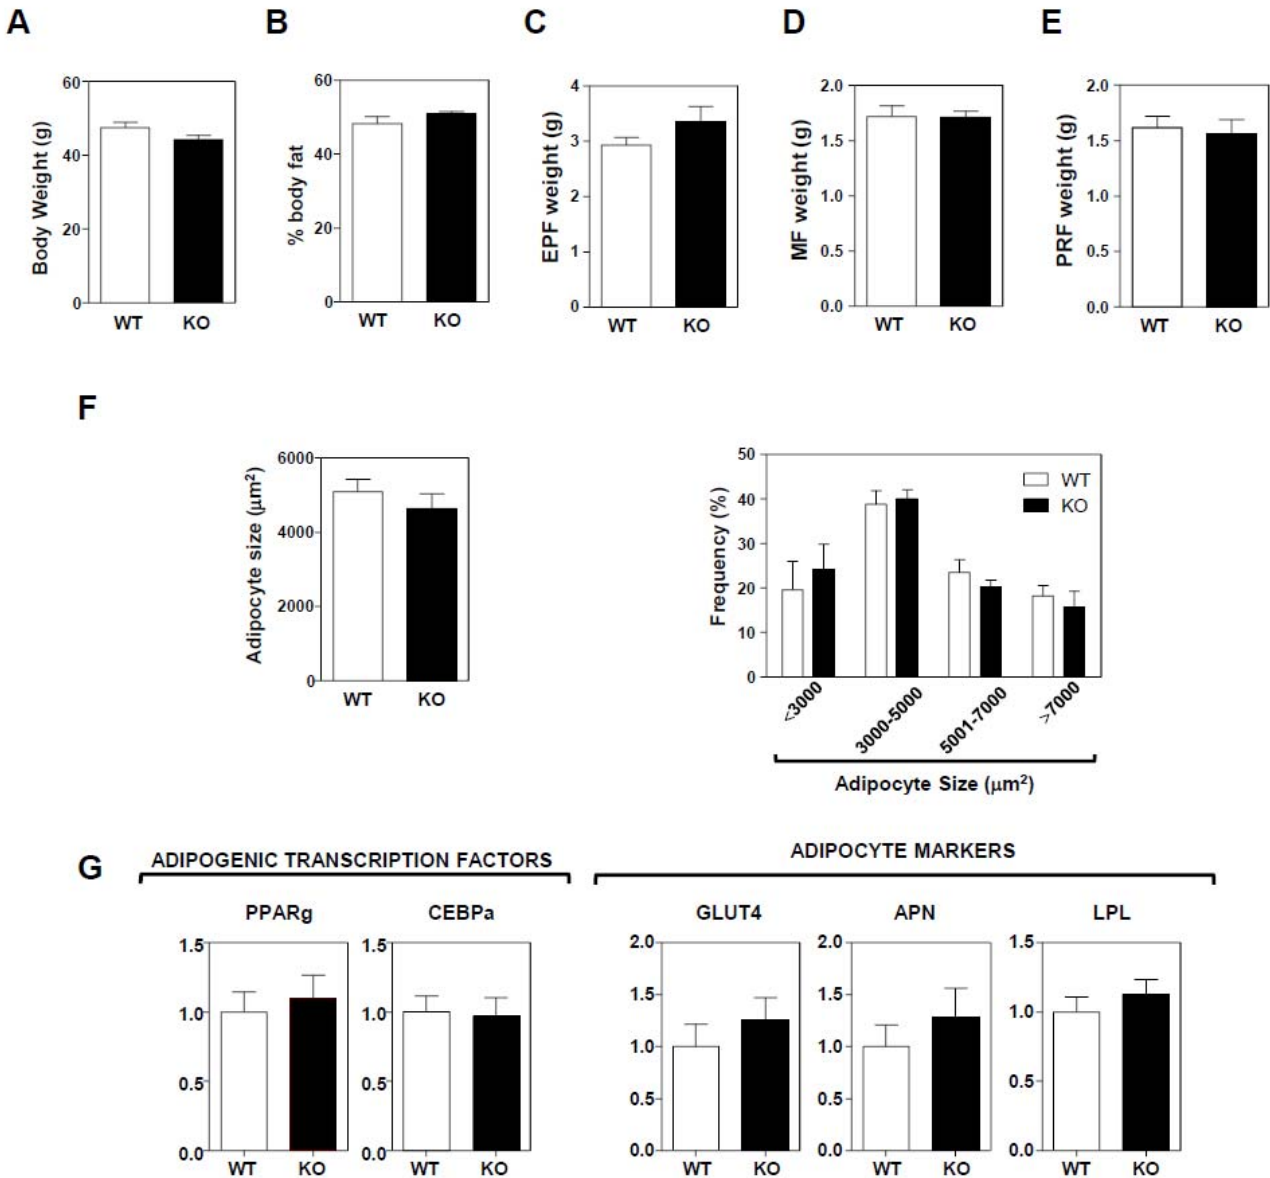

SUPPLEMENTARY DATA

**Supplementary Figure 3. Myeloid-specific Wnt5a overexpression does not affect glucose homeostasis in lean mice.** (A) Schematic representation of the Cre-LoxP strategy used to generate myeloid-specific Wnt5a-overexpressing mice. (B) Body weight, (C) GTT and (D) ITT of 20-week-old Mye-Wnt5a-TG mice and WT littermates (n=6-8) fed standard chow diet.

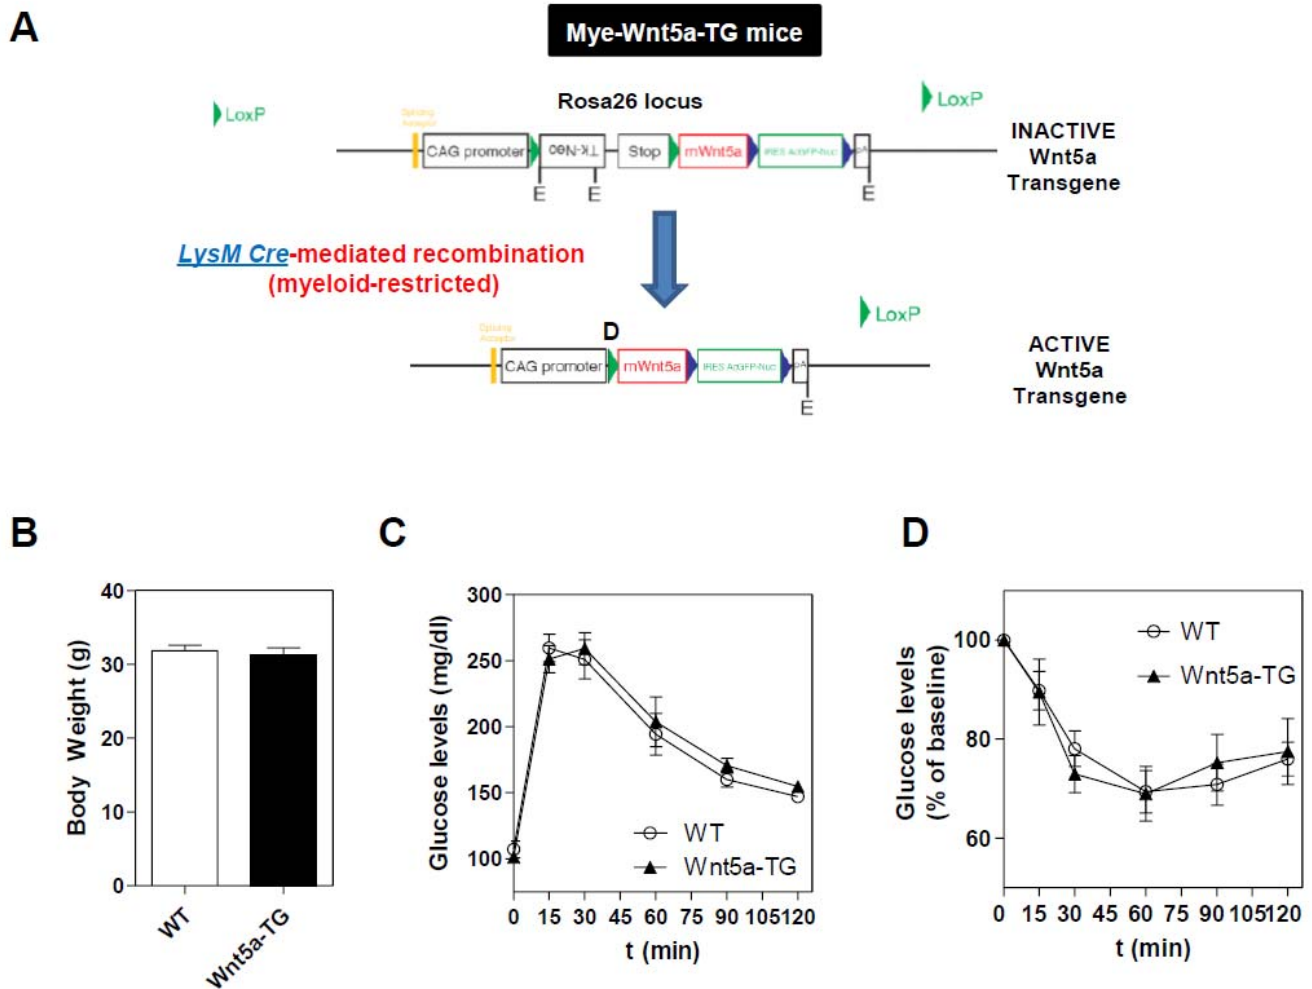

SUPPLEMENTARY DATA

**Supplementay Figure 4. Myeloid-specific Wnt5a overexpression does not affect adipogenic expansion of white adipose tissue in HFHS-fed mice.** Mye-Wnt5a-TG mice and WT littermates were fed a HFHS for 12 weeks (n=4-9). (A) Body weight. (B) % body fat mass assessed by magnetic resonance imaging (EchoMRI-700, Echo Medical System). (C) Epididymal fat weight. (D) Mesenteric fat weight. (E) Peri-renal fat weight. (F) Adipocyte size evaluated by computer-assisted morphometric analysis. (G) qRT-PCR analysis of transcript expression of several adipogenic transcription factors and adipocyte markers in epididymal fat.

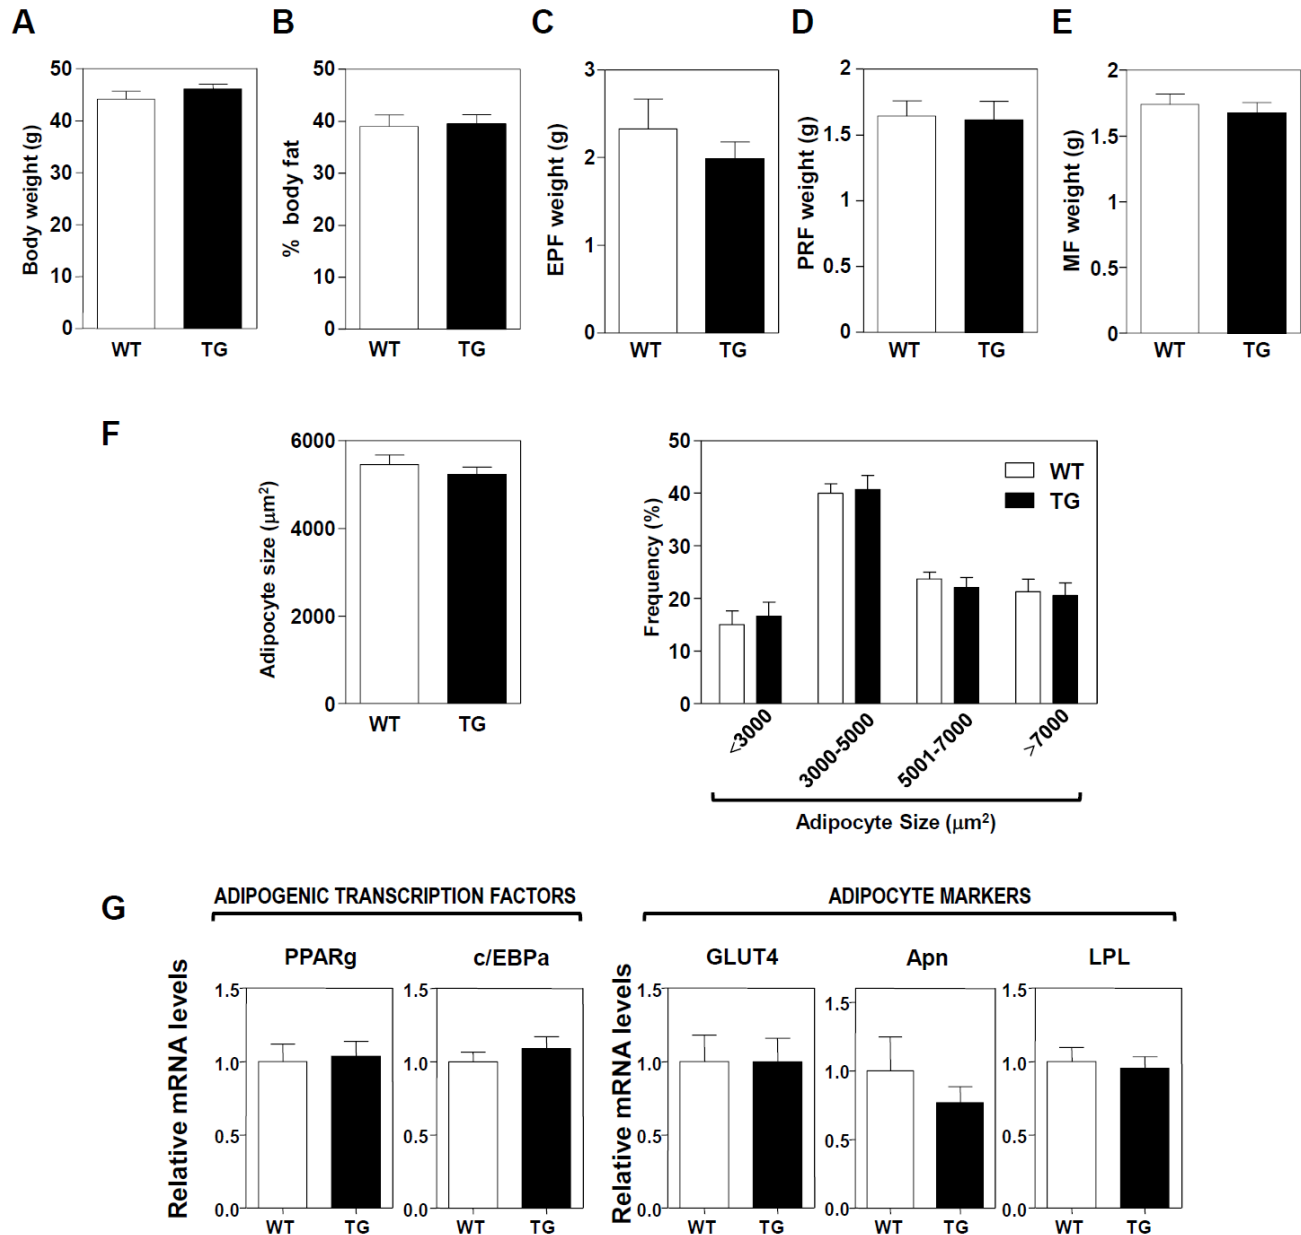

**Supplementary Figure 5. Wnt5a-induced pro-inflammatory activation of macrophages promotes defective insulin signaling in adipocytes.** (A, B) Epididymal WAT from normal diet (ND)- and HFHS-fed Wnt5a-KO and WT littermates (A) or Mye-Wnt5a-TG and WT littermates (B) was collected 10 minutes after intraperitoneal delivery of 0.75 U/kg of insulin, and Akt phosphorylation was evaluated by Western Blot. At least three independent pools of two mice per genotype and dietary regimen were analyzed. *Left*, densitometric quantification of the pAkt(S473)/Akt ratio. *Right*, representative immunoblot.

**A**

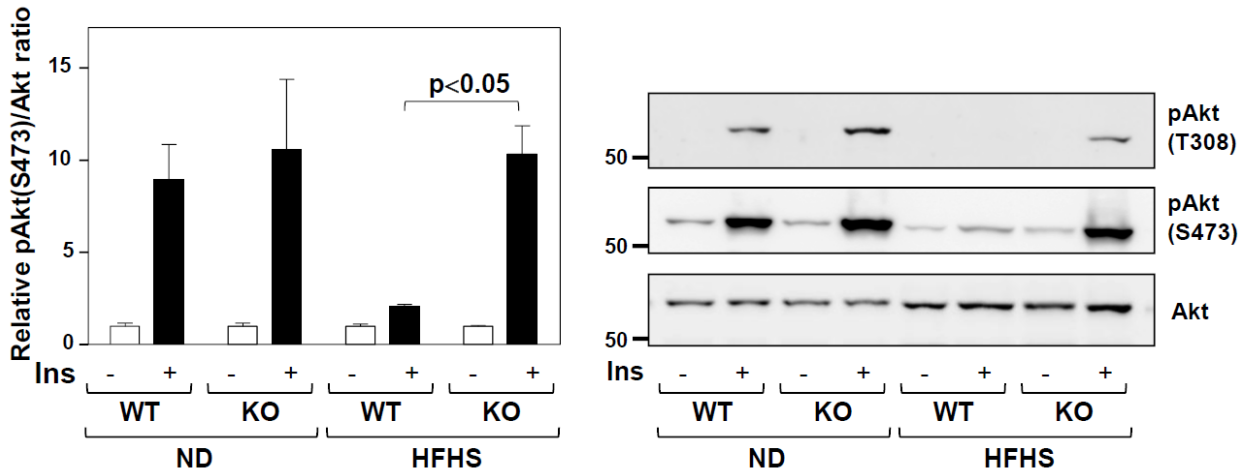

**B**

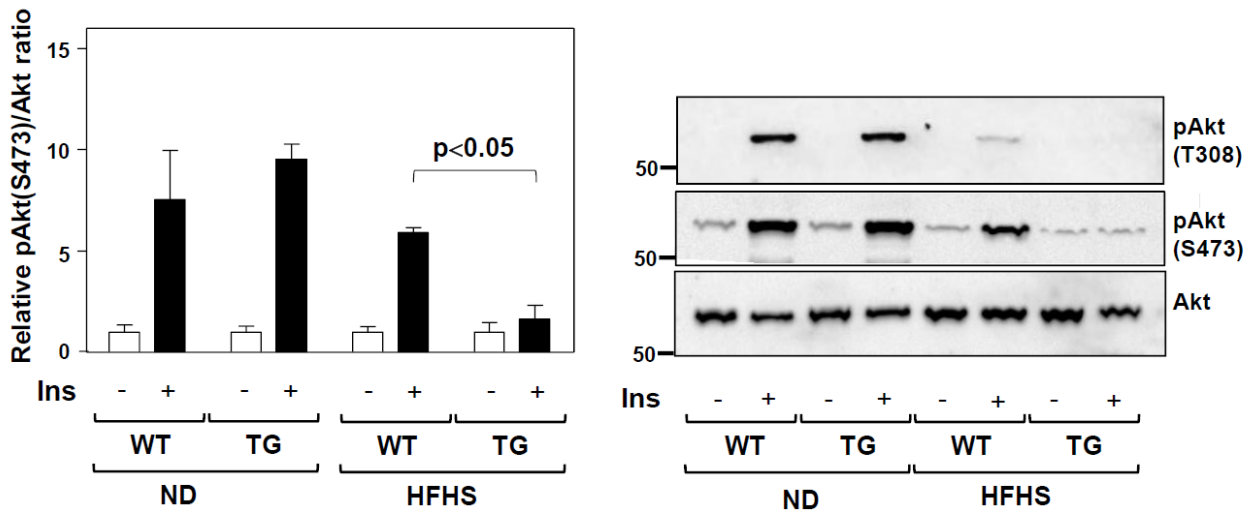

**Supplementary Figure 6. JNK activation and IL-6 induction in macrophages mediate the effects of Wnt5a on adipocyte insulin signaling (A)** Western Blot analysis of the effects of recombinant Wnt5a in insulin-induced Akt phosphorylation in cultured adipocytes. Mouse 3T3-L1 cells were maintained in DMEM with 10% calf serum and differentiated into adipocytes by treatment with DMEM supplemented with 5  $\mu\text{g/ml}$  of insulin, 0.5 mM 1-methyl-3-isobutyl-xanthin, and 1  $\mu\text{M}$  dexamethasone. Differentiated 3T3-L1 adipocytes were treated with recombinant Wnt5a (200 ng/ml) for 24 h and then stimulated with 100 nM insulin for 10 minutes. A representative experiment is shown. **(B)** Differentiated 3T3-L1 adipocytes were treated with 100 nM insulin for 10 min after a 24 h incubation with conditioned medium obtained from untreated, Wnt5a-treated or Wnt5a/SP600125-treated BM-derived macrophages. Insulin-induced Akt phosphorylation was analyzed by Western Blot. *Top*, densitometric quantification of the pAkt(S473)/Akt ratio. The graph shows the average of three independent experiments. *Bottom*, representative immunoblot. **(C)** Differentiated 3T3-L1 adipocytes were treated with 100 nM insulin for 10 min after a 24 h incubation with conditioned medium obtained from untreated or Wnt5a-treated macrophages containing 1  $\mu\text{g/ml}$  IL-6-neutralizing antibody or control IgG (R&D Systems). Insulin-induced Akt phosphorylation was analyzed by Western Blot. *Left*, densitometric quantification of the pAkt(S473)/Akt ratio. The graph shows the average of three independent experiments. *Right*, representative immunoblot.

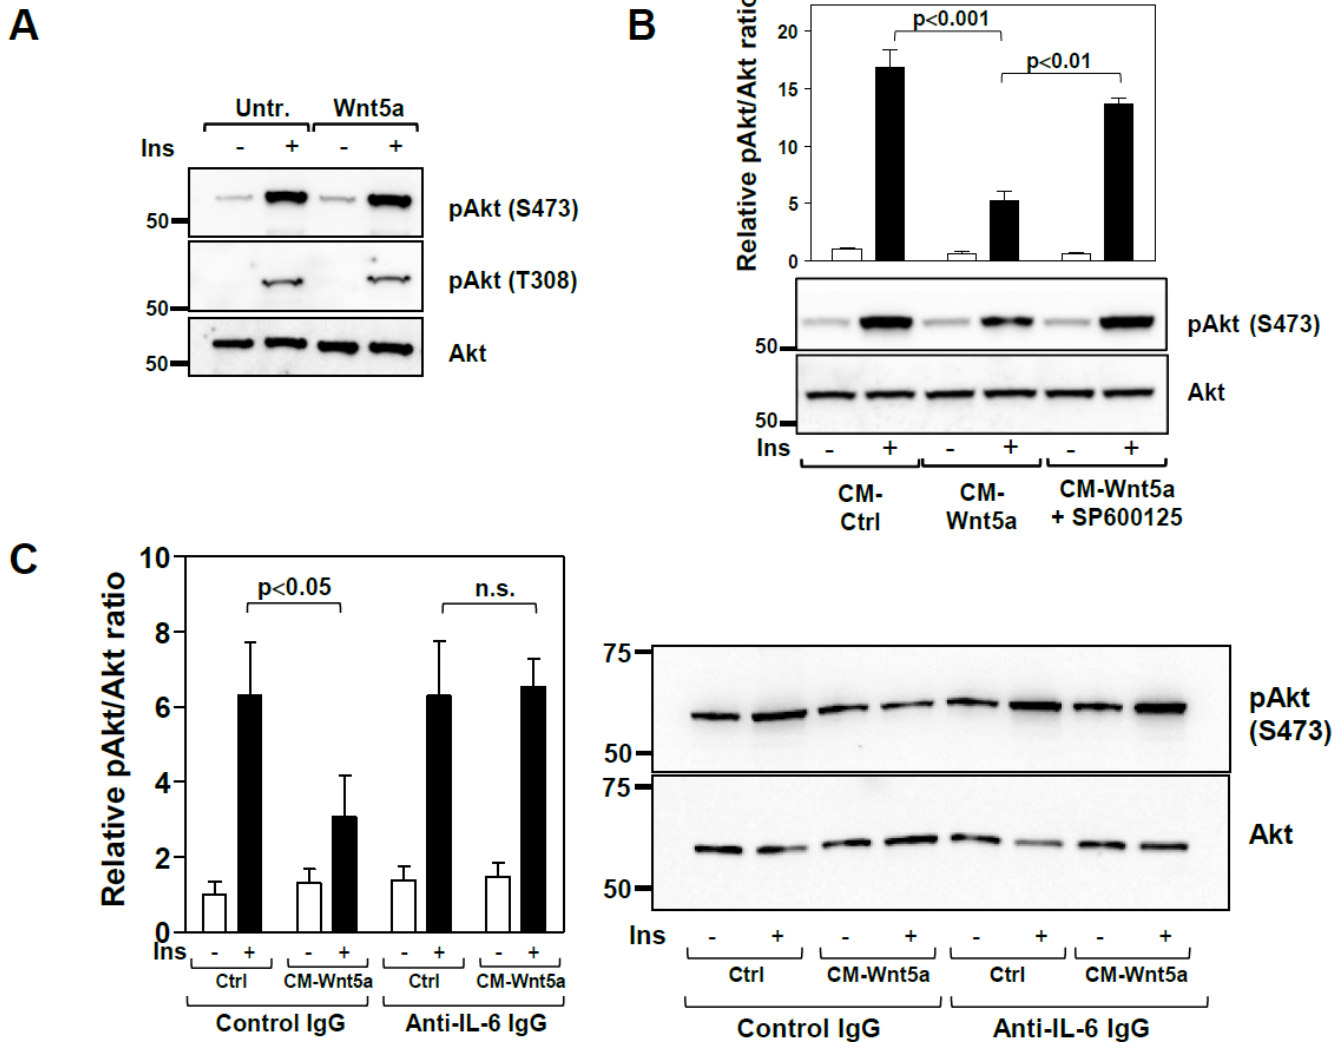

SUPPLEMENTARY DATA

**Supplementary Table 1. Human study population characteristics.**

Data expressed as Mean±SEM

| <b>Clinical parameter</b> |         |
|---------------------------|---------|
| Age (years)               | 42±2    |
| Female sex (%)            | 74%     |
| BMI (kg/m <sup>2</sup> )  | 45±1    |
| Waist circumference (cm)  | 132±3   |
| Weight (kg)               | 125±5   |
| Systolic Blood Pressure   | 127±2   |
| Diastolic Blood Pressure  | 73±1    |
| Insulin (mU/ml)           | 15±3    |
| Fasting glucose (mg/dl)   | 118±13  |
| HOMA                      | 4±1     |
| HbA1C (%)                 | 6.3±0.4 |
| Triglycerides (mg/dl)     | 122±13  |
| Total cholesterol (mg/dl) | 175±7   |
| HDL-cholesterol (mg/dl)   | 42±1    |
| LDL-cholesterol (mg/dl)   | 109±5   |
| Diabetes (%)              | 34%     |
| Hypertension (%)          | 51%     |
| Hypercholesterolemia (%)  | 20%     |



SUPPLEMENTARY DATA

**Supplementary Table 2. Primers used for mouse gene expression analysis by qRT-PCR**

| <b>Gene</b>      | <b>FW primer</b>           | <b>RV primer</b>         |
|------------------|----------------------------|--------------------------|
| 36B4             | GCTCCAAGCAGATGCAGCA        | CCGGATGTGAGGCAGCAG       |
| TNF- $\alpha$    | CGGAGTCCGGGCAGG            | GCTGGGTAGAGAATGGATGAA    |
| MCP-1            | CAGCCAGATGCAGTTAACGC       | GCCTACTCATTGGGATCATCTTG  |
| IL-6             | GCTACCAAACCTGGATATAATCAGGA | CCAGGTAGCTATGGTACTCCAGAA |
| Wnt5a            | CTGGCTCCTGTAGCCTCAAG       | GCCGCGCTATCATACTTCTC     |
| Wnt5a (Exon 2-3) | GAGGTGCCATGTCTTCCAAG       | TACTTCTGACATCTGAACAGGG   |
| F4/80            | CTTTGGCTATGGGCTTCCAGTC     | GCAAGGAGGACAGAGTTTATCGTG |
| CD68             | TTCTCCAGCTGTTACCTTGACCT    | GTTGCAAGAGAAACATGGCCCGAA |
| CD11c            | ATGGAGCCTCAAGACAGGAC       | GGATCTGGGATGCTGAAATC     |
